# Supplementary material
Source: publisher site journal article supplement (https://www.dovepress.com/article/447875)
Supplement: Supplementary file 1 [file get_supplementary_file.php]

| **Supplementary Table 1 Multivariate analysis of change in study outcomes from baseline to final follow-up** | | | | | |
| --- | --- | --- | --- | --- | --- |
|  | **Total Sample** | **OHT** | **Early POAG** | **Moderate POAG** | **Severe POAG** |
| **Change in IOP** | -2.88 ± 5.75, **p<0.001***,** 95% CI= [-3.68, -2.07] | -3.96 ± 5.48, **p<0.001*****, 95% CI=[-6.05, -1.86] | -3.63 ± 5.71, p=0.146, 95% CI= [-12.6, 2.30] | -2.31 ± 5.70, **p=0.009****, 95% CI=[-7.84, -1.60] | -2.45 ± 5.32, p=0.399, 95% CI= [-7.10, 3.50] |
| **Change in logMAR BCVA** | 0.11 ± 0.33, **p<0.001*****, 95% CI= [-0.06, 0.16] | -0.037 ± 0.15, p=0.253, 95% CI= [-0.10, 0.03] | 0.04 ± 0.18, **p=0.002****, 95% CI= [0.01, 0.04] | 0.14 ± 0.32, p=0.174, 95% CI= [-0.032, 0.146] | 0.21 ± 0.46, p=0.314, 95% CI= [-0.30, 0.82] |
| **Change in topical medications** | -0.07 ± 1.01, p=0.364, 95% CI= [-0.21, 0.08] | -0.32 ± 0.84, p=0.053, 95% CI= [-0.64, 0.004] | 0.24 ± 1.06, p=0.138, 95% CI= [-0.69, 0.12] | 0.06 ± 0.91, p=0.573, 95% CI= [-0.43, 0.71] | -0.32 ± 1.04, p=0.316, 95% CI= [-1.82, 0.68] |
| **Change in drug classes** | -0.03 ± 1.52, p=0.762, 95% CI= [-0.25, 0.18] | 0.00 ± 1.38, p=1.000, 95%  CI= [-0.53, 0.53] | 0.24 ± 1.06, p=0.664, 95% CI= [-0.89, 0.60] | 0.14 ± 1.33, p=0.573, 95% CI= [-0.86, 1.43] | -0.56 ± 1.69, p=0.227, 95% CI= [-2.79, 0.79] |

Change in IOP multivariate model accounted for age, sex, patient ethnicity, baseline IOP, baseline number and classes of topical glaucoma medications, prior number of SLT procedures, prior cataract surgery, surgeon, laser power, repeat procedures, as well as inter-eye variability.

Change in logMAR BCVA multivariate model accounted for age, sex, patient ethnicity, baseline logMAR BCVA, baseline number and classes of topical glaucoma medications, prior number of SLT procedures, prior cataract surgery, surgeon, laser power, repeat procedures, as well as inter-eye variability.

Change in topical medications and drug classes multivariate model accounted for age, sex, patient ethnicity, baseline number and classes of topical glaucoma medications, prior number of SLT procedures, prior cataract surgery, surgeon, laser power, repeat procedures, as well as inter-eye variability.

** p<0.005, *** p<0.001

| **Supplementary Table 2 Differences in baseline and final outcomes between study cohorts** | | | | | | |
| --- | --- | --- | --- | --- | --- | --- |
|  |  | **Mean Difference** | **Standard Error** | **p-value** | **95% CI Lower Bound** | **95% CI Upper Bound** |
| **Baseline IOP** | OHT vs Early POAG | 0.460 | 1.226 | 0.982 | -3.65 | 2.72 |
| OHT vs Moderate POAG | 0.595 | 1.287 | 0.967 | -2.75 | 3.94 |
| OHT vs Severe POAG | 1.649 | 1.210 | 0.524 | -1.49 | 4.79 |
| Early POAG vs Moderate POAG | 1.055 | 1.061 | 0.753 | -1.70 | 3.81 |
| Early POAG vs Severe POAG | 2.110 | 0.966 | 0.133 | -0.40 | 4.62 |
| Moderate POAG vs Severe POAG | 1.054 | 1.042 | 0.743 | -1.65 | 3.76 |
| **Final IOP** | OHT vs Early POAG | -0.785 | 1.442 | 0.948 | -4.53 | 2.96 |
| OHT vs Moderate POAG | -1.045 | 1.513 | 0.900 | -4.98 | 2.89 |
| OHT vs Severe POAG | -0.205 | 1.423 | 0.999 | -3.90 | 3.49 |
| Early POAG vs Moderate POAG | -0.261 | 1.247 | 0.997 | -3.50 | 2.98 |
| Early POAG vs Severe POAG | 0.579 | 1.136 | 0.957 | -2.37 | 3.53 |
| Moderate POAG vs Severe POAG | 0.840 | 1.226 | 0.903 | -2.34 | 4.02 |
| **Change in IOP** | OHT vs Early POAG | -0.324 | 1.492 | 0.996 | -4.20 | 3.55 |
| OHT vs Moderate POAG | -1.640 | 1.566 | 0.722 | -5.71 | 2.43 |
| OHT vs Severe POAG | -1.855 | 1.473 | 0.590 | -5.68 | 1.97 |
| Early POAG vs Moderate POAG | -1.316 | 1.291 | 0.738 | -4.67 | 2.04 |
| Early POAG vs Severe POAG | -1.530 | 1.176 | 0.564 | -4.59 | 1.53 |
| Moderate POAG vs Severe POAG | -0.214 | 1.269 | 0.998 | -3.51 | 3.08 |
| **Baseline logMAR BCVA** | OHT vs Early POAG | 0.328 | 0.110 | 0.018 | 0.041 | 0.61 |
| OHT vs Moderate POAG | 0.268 | 0.116 | 0.101 | -0.03 | 0.57 |
| OHT vs Severe POAG | 0.099 | 0.109 | 0.802 | -0.18 | 0.38 |
| Early POAG vs Moderate POAG | -0.060 | 0.096 | 0.924 | -0.31 | 0.19 |
| Early POAG vs Severe POAG | -0.229 | 0.087 | 0.046 | -0.46 | 0.00 |
| Moderate POAG vs Severe POAG | -0.169 | 0.094 | 0.278 | -0.41 | 0.08 |
| **Final logMAR BCVA** | OHT vs Early POAG | 0.247 | 0.142 | 0.303 | -0.12 | 0.62 |
| OHT vs Moderate POAG | 0.093 | 0.149 | 0.924 | -0.29 | 0.48 |
| OHT vs Severe POAG | -0.149 | 0.140 | 0.710 | -0.51 | 0.21 |
| Early POAG vs Moderate POAG | -0.154 | 0.122 | 0.589 | -0.47 | 0.16 |
| **Early POAG vs Severe POAG** | **-0.396** | **0.112** | **0.003*** | **-0.69** | **-0.11** |
| Moderate POAG vs Severe POAG | -0.242 | 0.120 | 0.188 | -0.56 | 0.07 |
| **Change in logMAR BCVA** | OHT vs Early POAG | -0.080 | 0.104 | 0.867 | -0.35 | 0.19 |
| OHT vs Moderate POAG | -0.175 | 0.109 | 0.382 | -0.46 | 0.11 |
| OHT vs Severe POAG | -0.248 | 0.083 | 0.017 | -0.46 | -0.03 |
| Early POAG vs Moderate POAG | -0.095 | 0.090 | 0.720 | -0.33 | 0.14 |
| Early POAG vs Severe POAG | -0.168 | 0.066 | 0.060 | -0.34 | 0.00 |
| Moderate POAG vs Severe POAG | -0.073 | 0.072 | 0.737 | -0.26 | 0.11 |
| **Baseline topical medications** | OHT vs Early POAG | 0.684 | 0.253 | 0.038 | 0.03 | 1.34 |
| OHT vs Moderate POAG | 0.242 | 0.266 | 0.800 | -0.45 | 0.93 |
| OHT vs Severe POAG | 0.047 | 0.250 | 0.998 | -0.60 | 0.70 |
| Early POAG vs Moderate POAG | -0.442 | 0.219 | 0.185 | -1.01 | 0.13 |
| Early POAG vs Severe POAG | -0.637 | 0.199 | 0.009 | -1.15 | -0.12 |
| Moderate POAG vs Severe POAG | -0.194 | 0.215 | 0.803 | -0.75 | 0.36 |
| **Final topical medications** | OHT vs Early POAG | 0.126 | 0.276 | 0.968 | -0.59 | 0.84 |
| OHT vs Moderate POAG | -0.134 | 0.290 | 0.967 | -0.89 | 0.62 |
| OHT vs Severe POAG | 0.049 | 0.272 | 0.998 | -0.66 | 0.76 |
| Early POAG vs Moderate POAG | -0.260 | 0.239 | 0.696 | -0.88 | 0.36 |
| Early POAG vs Severe POAG | -0.077 | 0.217 | 0.984 | -0.64 | 0.49 |
| Moderate POAG vs Severe POAG | 0.183 | 0.235 | 0.864 | -0.43 | 0.79 |
| **Change in topical medications** | OHT vs Early POAG | -0.557 | 0.257 | 0.136 | -1.22 | 0.11 |
| OHT vs Moderate POAG | -0.375 | 0.269 | 0.505 | -1.07 | 0.32 |
| OHT vs Severe POAG | 0.002 | 0.253 | 1.000 | -0.66 | 0.66 |
| Early POAG vs Moderate POAG | 0.182 | 0.222 | 0.845 | -0.39 | 0.76 |
| Early POAG vs Severe POAG | 0.559 | 0.202 | 0.032 | 0.03 | 1.08 |
| Moderate POAG vs Severe POAG | 0.377 | 0.218 | 0.312 | -0.19 | 0.94 |
| **Baseline drug classes** | OHT vs Early POAG | 0.834 | 0.360 | 0.099 | -0.10 | 1.77 |
| OHT vs Moderate POAG | 0.125 | 0.378 | 0.988 | -0.86 | 1.11 |
| OHT vs Severe POAG | -0.298 | 0.356 | 0.836 | -1.22 | 0.63 |
| Early POAG vs Moderate POAG | -0.709 | 0.312 | 0.109 | -1.52 | 0.10 |
| **Early POAG vs Severe POAG** | **-1.132** | **0.284** | **<0.001*** | **-1.87** | **-0.39** |
| Moderate POAG vs Severe POAG | -0.423 | 0.306 | 0.514 | -1.22 | 0.37 |
| **Final drug classes** | OHT vs Early POAG | 0.443 | 0.388 | 0.664 | -0.56 | 1.45 |
| OHT vs Moderate POAG | -0.018 | 0.407 | 1.000 | -1.08 | 1.04 |
| OHT vs Severe POAG | 0.262 | 0.383 | 0.903 | -0.73 | 1.26 |
| Early POAG vs Moderate POAG | -0.461 | 0.336 | 0.518 | -1.33 | 0.41 |
| Early POAG vs Severe POAG | -0.181 | 0.306 | 0.934 | -0.97 | 0.61 |
| Moderate POAG vs Severe POAG | 0.280 | 0.330 | 0.831 | -0.58 | 1.14 |
| **Change in drug classes** | OHT vs Early POAG | -0.391 | 0.386 | 0.741 | -1.39 | 0.61 |
| OHT vs Moderate POAG | -0.143 | 0.405 | 0.985 | -1.19 | 0.91 |
| OHT vs Severe POAG | 0.560 | 0.380 | 0.457 | -0.43 | 1.55 |
| Early POAG vs Moderate POAG | 0.248 | 0.334 | 0.879 | -0.62 | 1.12 |
| Early POAG vs Severe POAG | 0.951 | 0.304 | 0.011 | 0.16 | 1.74 |
| Moderate POAG vs Severe POAG | 0.703 | 0.328 | 0.144 | -0.15 | 1.55 |

* p<0.008. Significance of p=0.008 determined using Bonferroni correction.
